# Supplementary material for: Metabolite-based dietary supplementation in human type 1 diabetes is associated with microbiota and immune modulation
Source: PubMed Central journal article supplement (PMC8772108; doi:10.1186/s40168-021-01193-9), 2022-01-19
Supplement: 40168_2021_1193_MOESM1_ESM.pdf [file 40168_2021_1193_MOESM1_ESM.pdf]

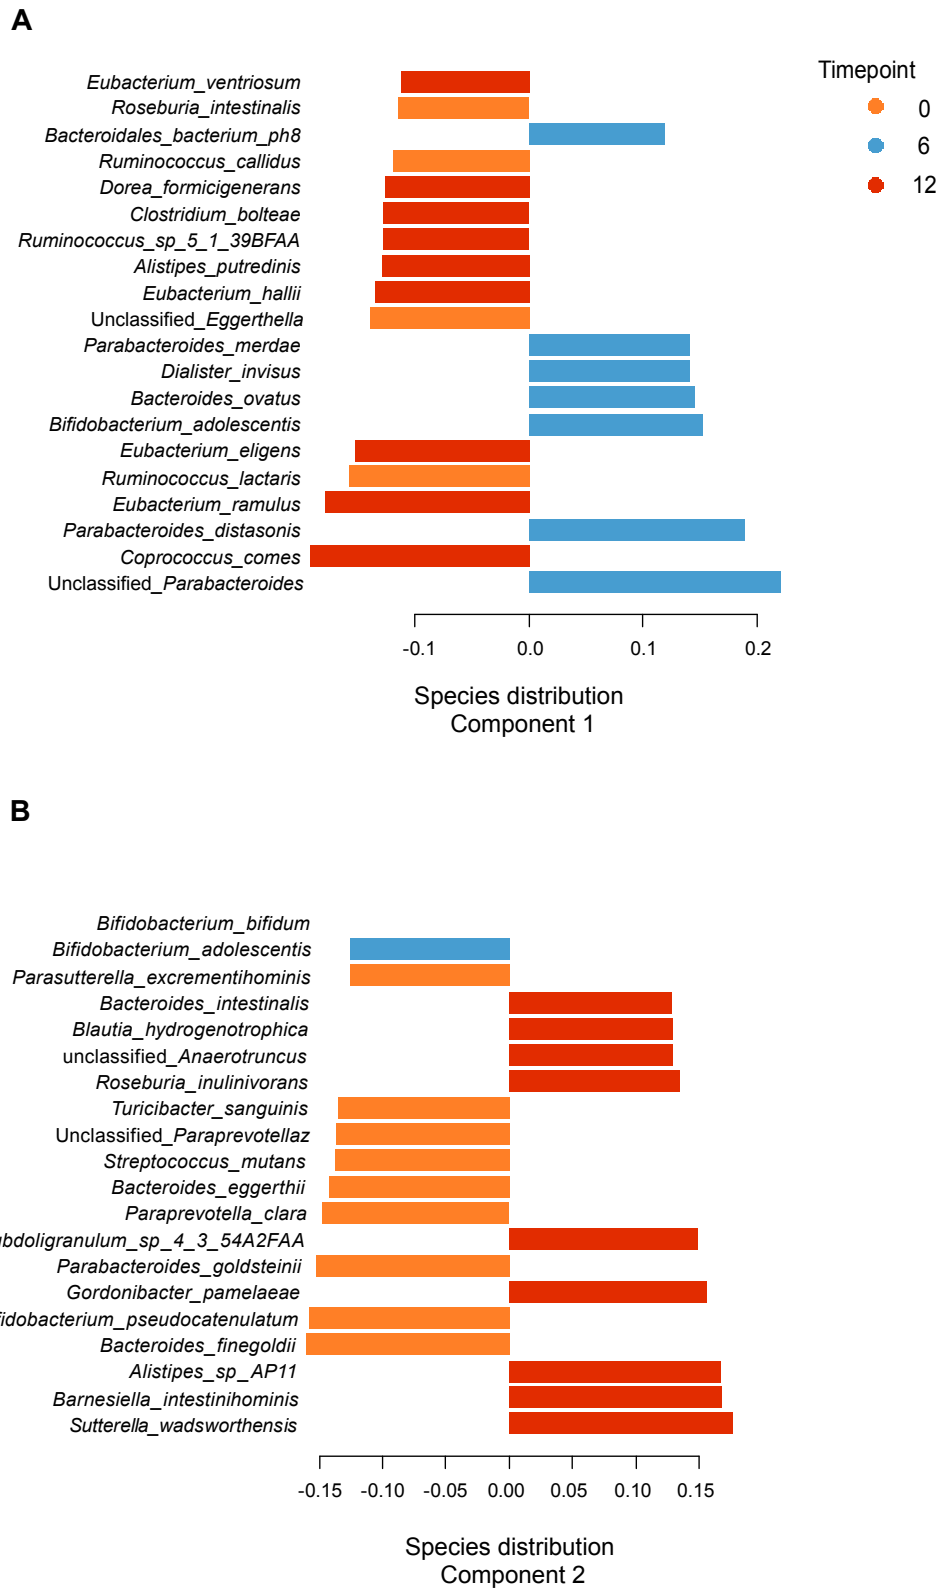

**Fig. S1. sPLS-DA plot loadings indicating the contribution of each taxa.** Color corresponds to the timepoint in which the taxa is most abundant. Loadings are associated with Fig. 3B (taxa).

(A) Component 1 species distribution

(B) Component 2 species distribution

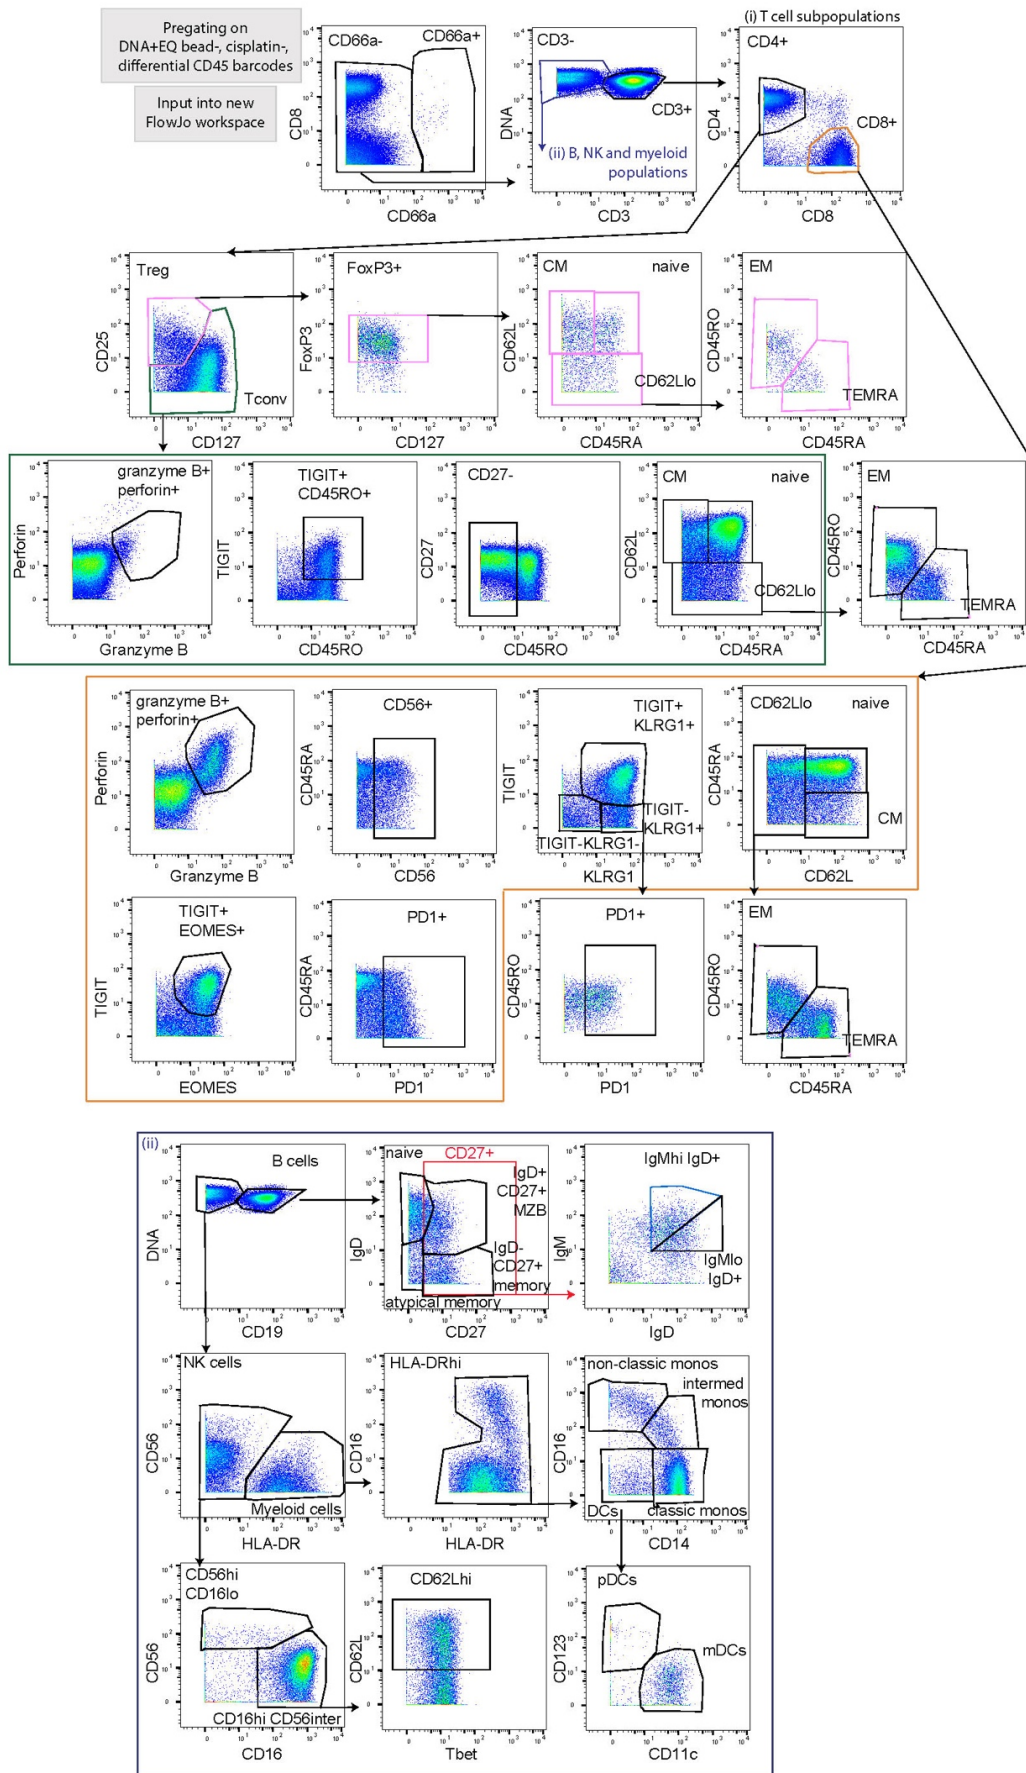

**Fig. S2. Gating Strategy for identification of immune cell phenotypes by CyTOF.**

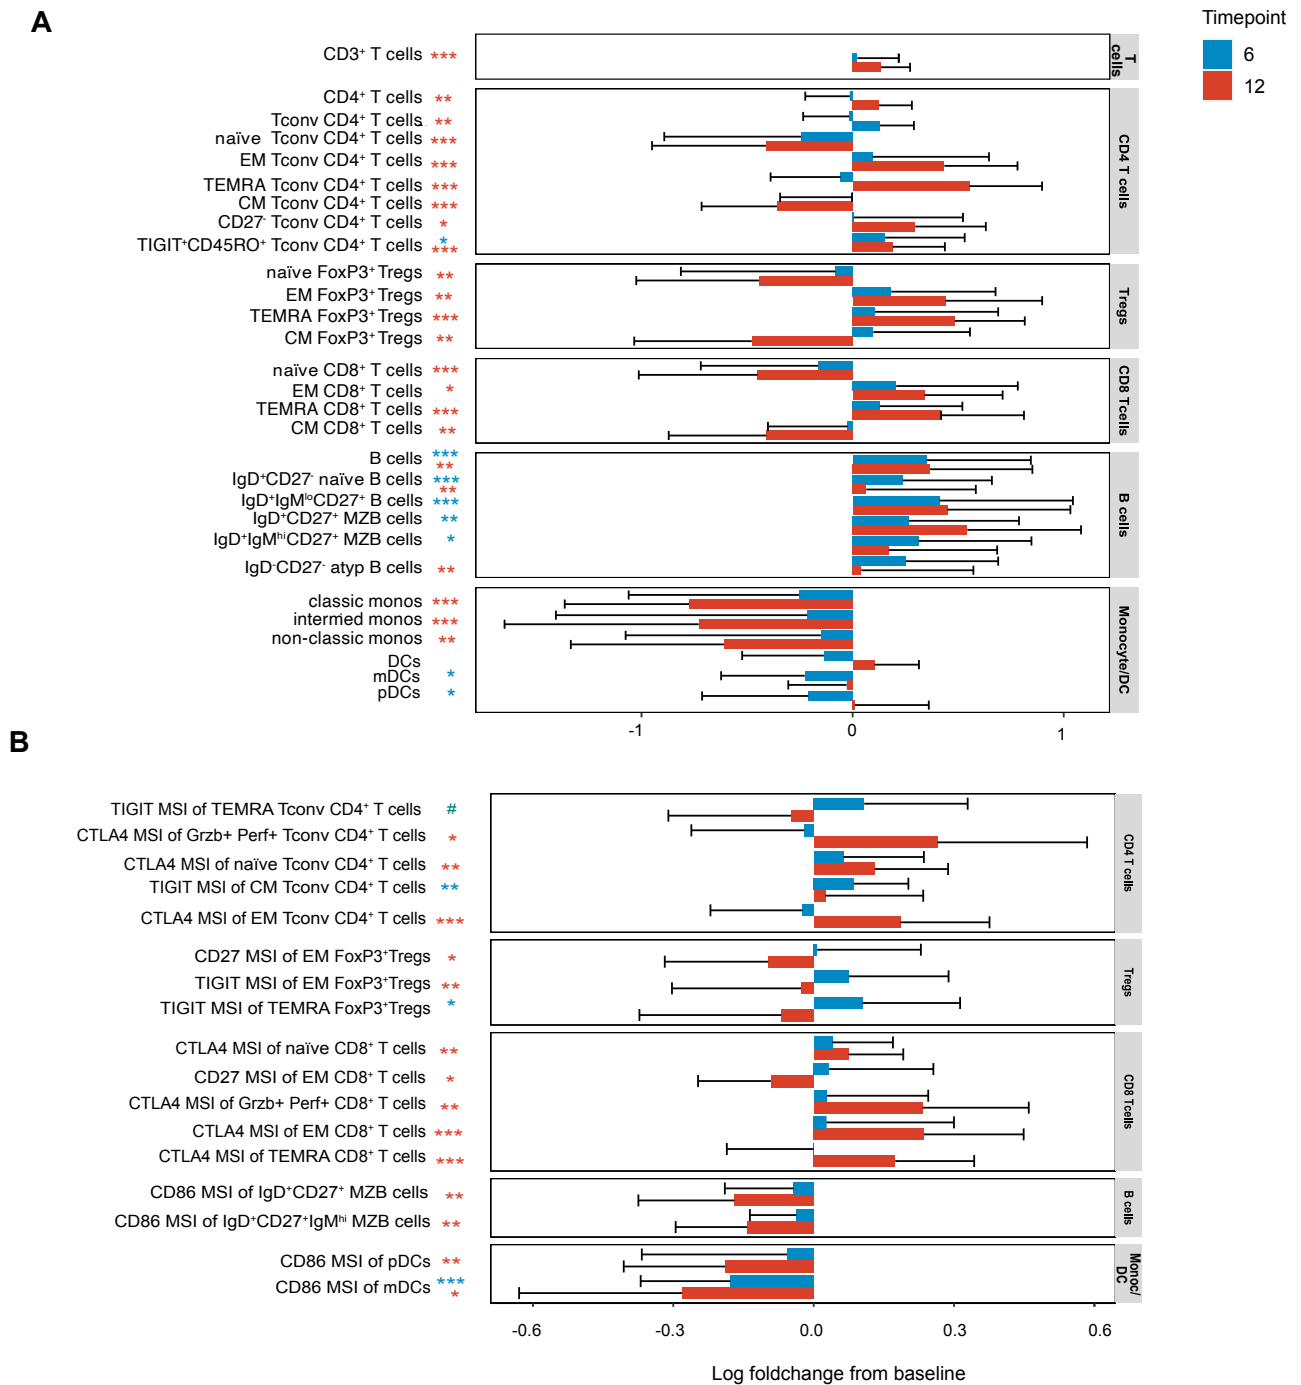

**Fig. S3. Immune cell phenotype changes following HAMSAB treatment.**

Log foldchange of frequency of live cells.

Log foldchange of MSI from baseline. Asterisk represents GEE significance of changes in % live and MSI across timepoints: blue asterisk W0 vs W6 and red asterisk W0 vs W12.

Mean and standard deviation are shown. #adjusted  $P < 0.1$ , \*adjusted  $P = 0.1- 0.05$ ,

\*\*adjusted  $P = 0.05-0.001$  \*\*\*adjusted  $P < 0.001$ .

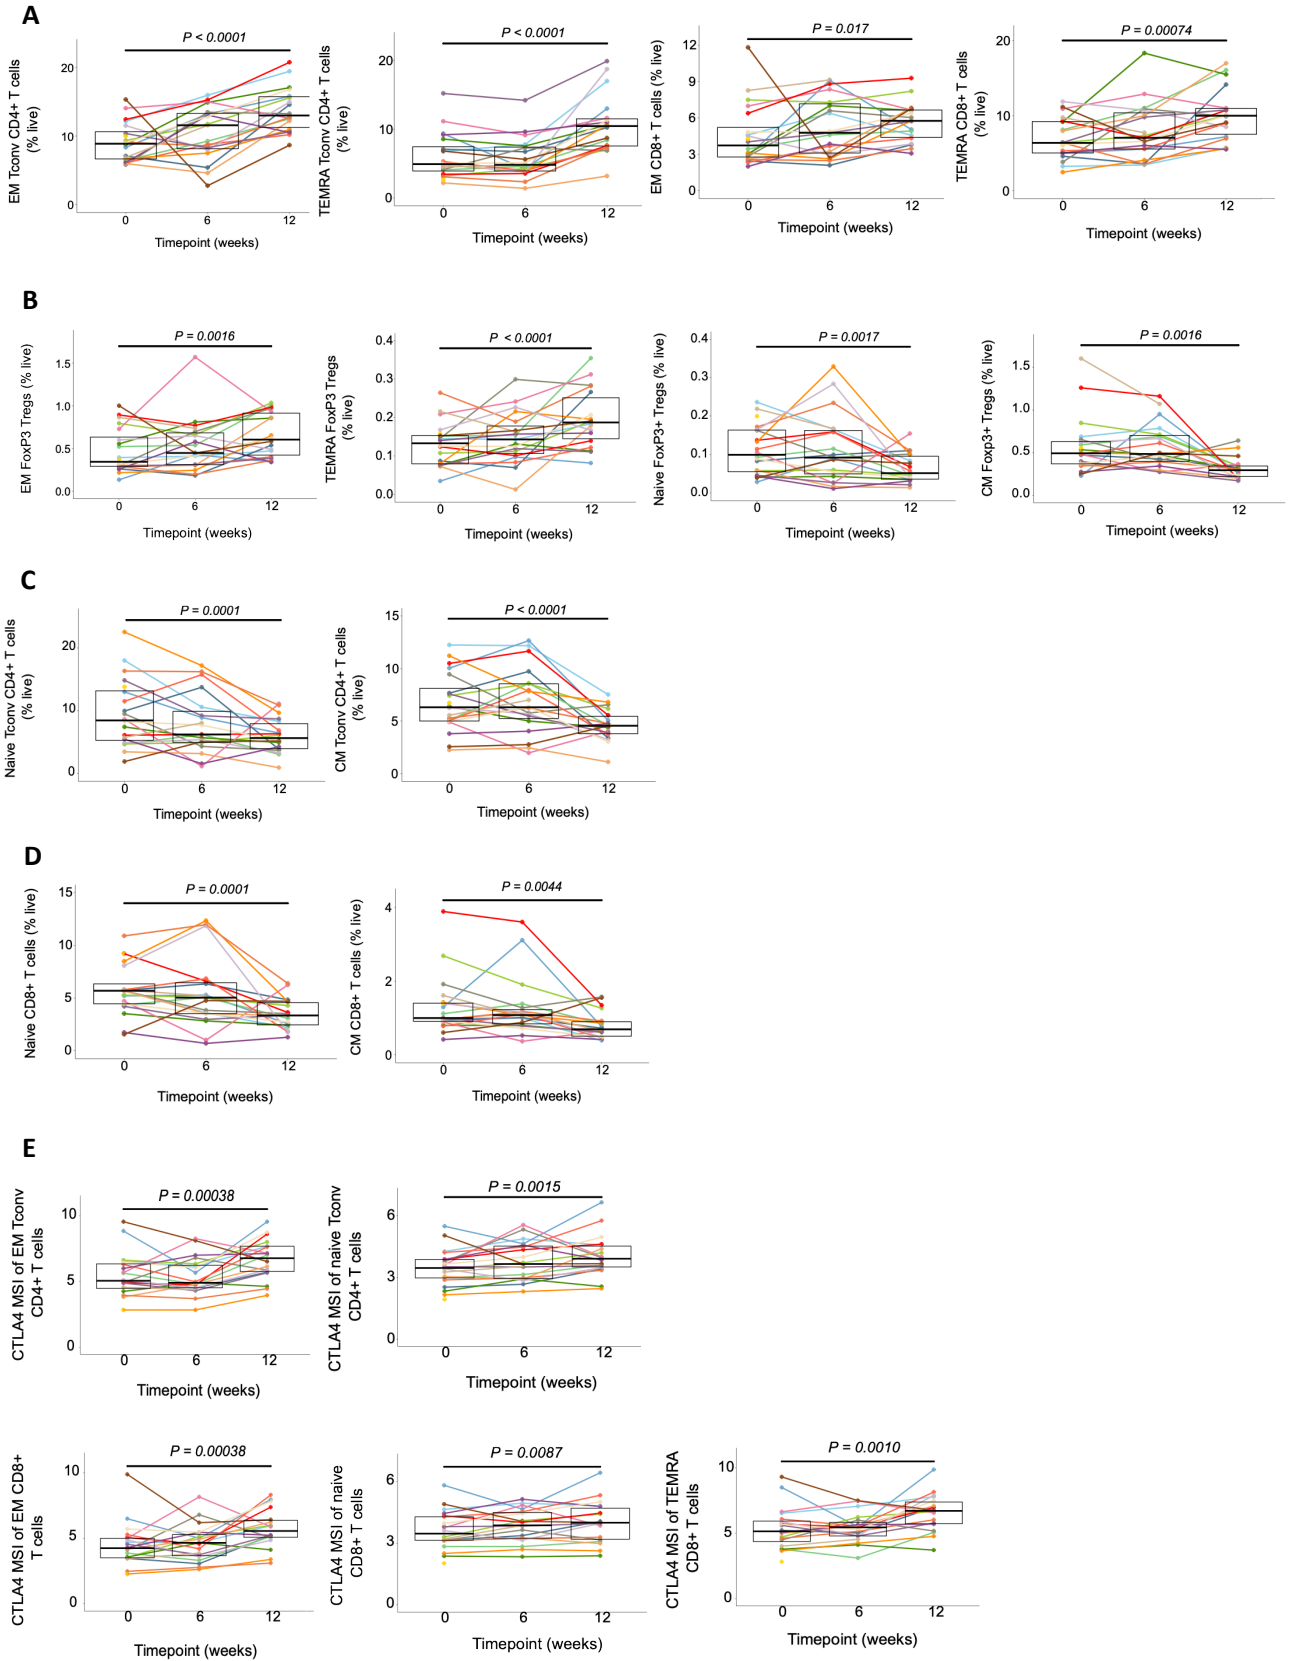

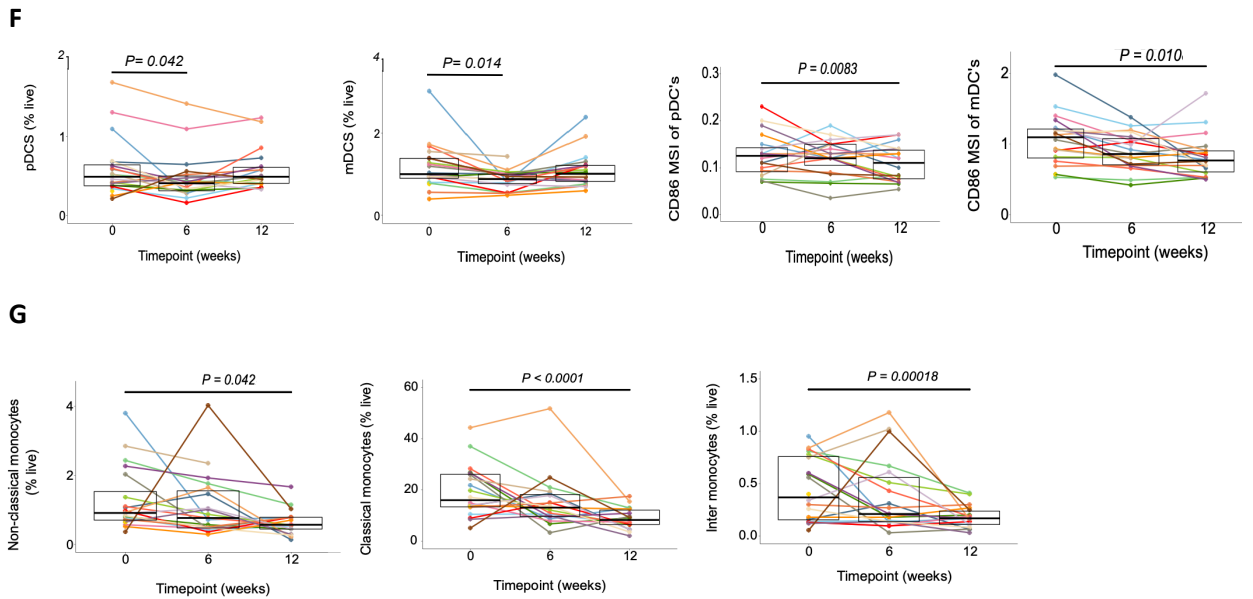

**Fig. S4. Immune cell phenotype changes following HAMSAB treatment.**

Mass cytometry of PBMC was used to determine total frequency (within live cells) or MSI of:

- (A) EM Tconv cells, Tconv TEMRA cells, CD8<sup>+</sup> EM and CD8<sup>+</sup> TEMRA cells.
- (B) EM Tregs, TEMRA Tregs, naïve Tregs, CM Tregs.
- (C) naïve and CM Tconv cells.
- (D) Naïve and CM CD8<sup>+</sup> T cells.
- (E) EM and naïve Tconv expressing CTLA-4 and EM, naïve and TEMRA CD8<sup>+</sup> T cells expressing CTLA4.
- (F) Frequency of total pDCs, mDCs and MSI of CD86.
- (G) Frequency of total non-classical, classical and intermediate monocytes. Coloured dots represent each subject. Box plots show mean and upper and lower quartile ranges. Significance determined by GEE. Adjusted *P* values are (6W vs W0) or (12W vs W0). Gating strategy shown in Fig. S2.

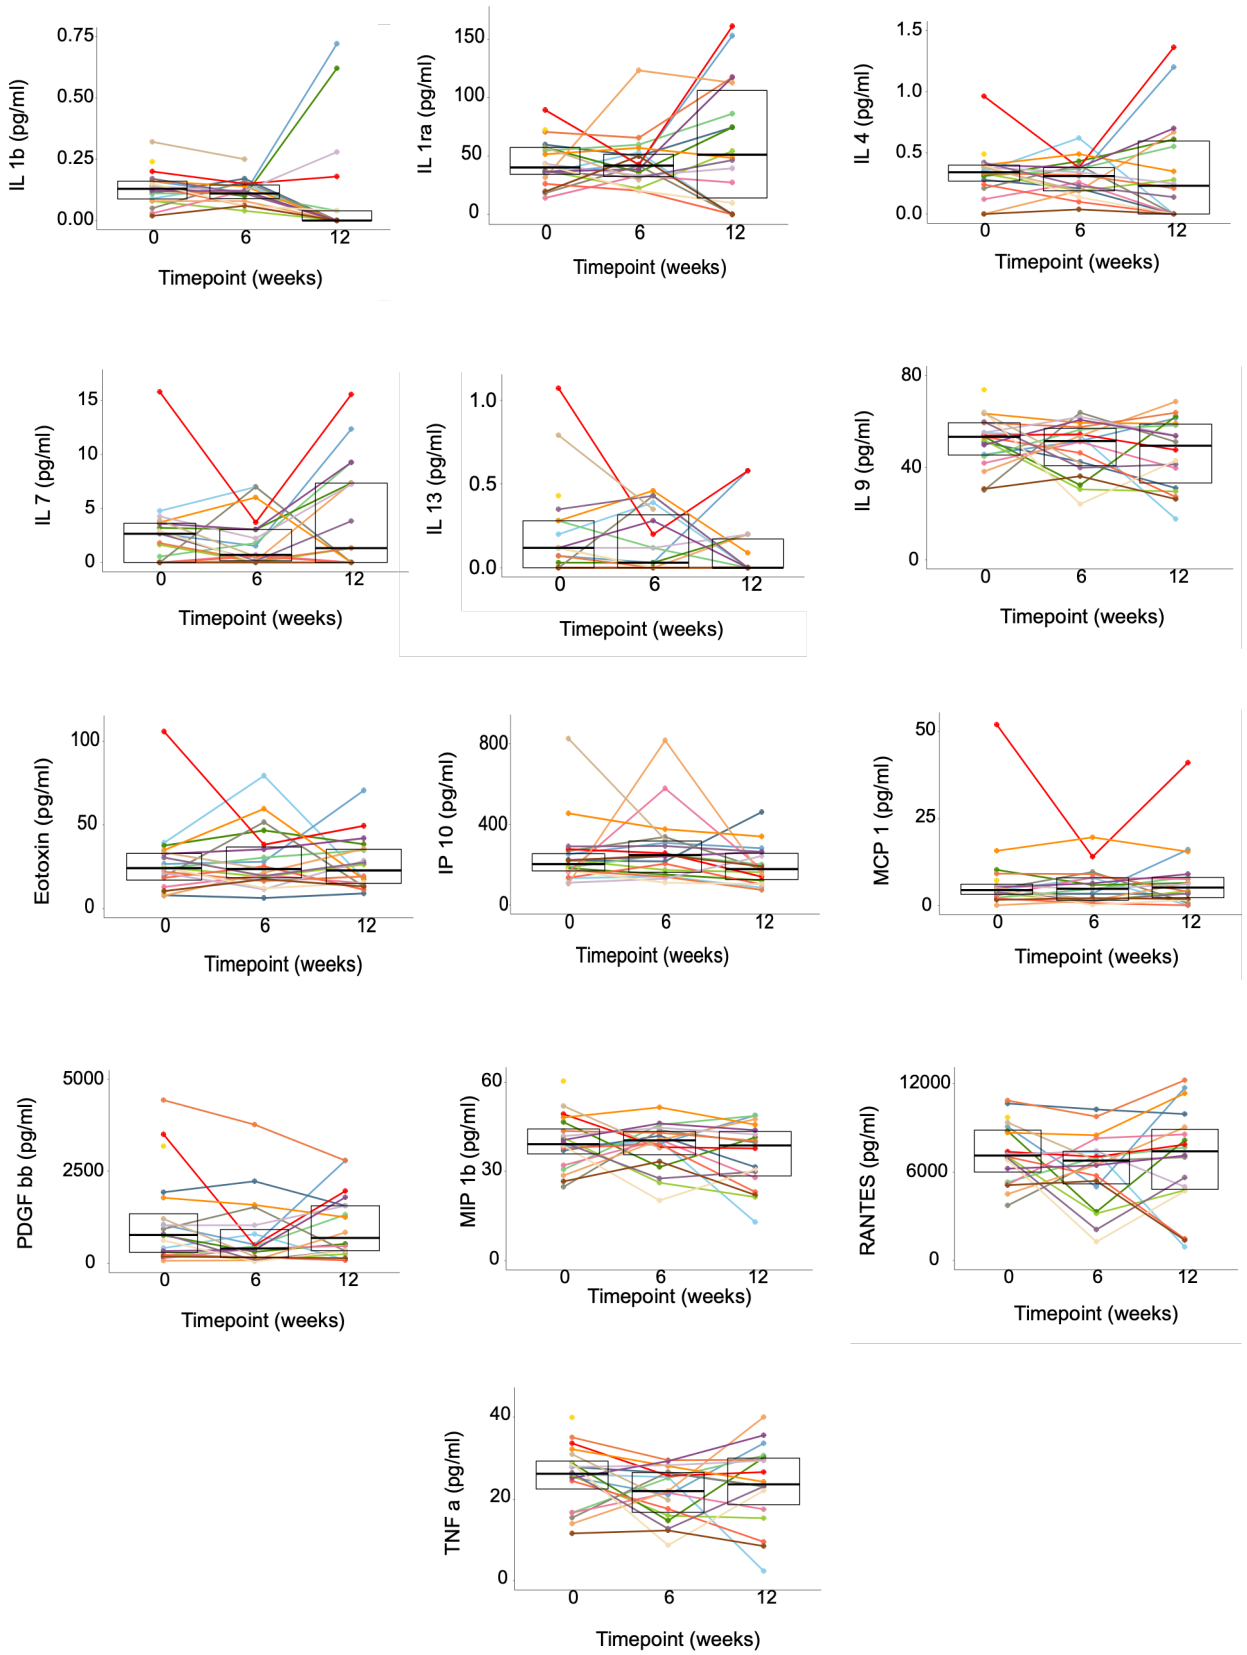

**Fig. S5. Circulating pro-inflammatory and anti-inflammatory cytokines measured in subjects at baseline, W6 and W12 following HAMSAB supplementation.** Overall significance determined by GEE. Adjusted  $P > 0.05$  (not significant in all the groups). Coloured dots represent each subject. Box plots show mean and upper and lower quartile ranges .

**A**

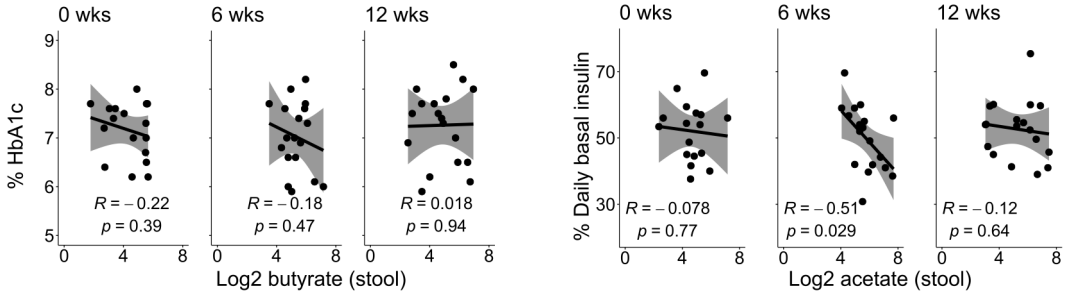

**B**

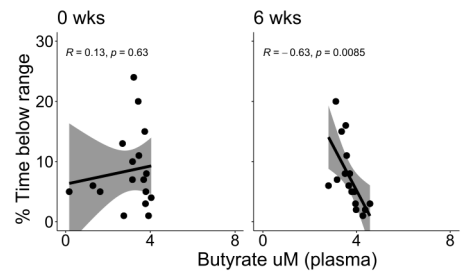

**C**

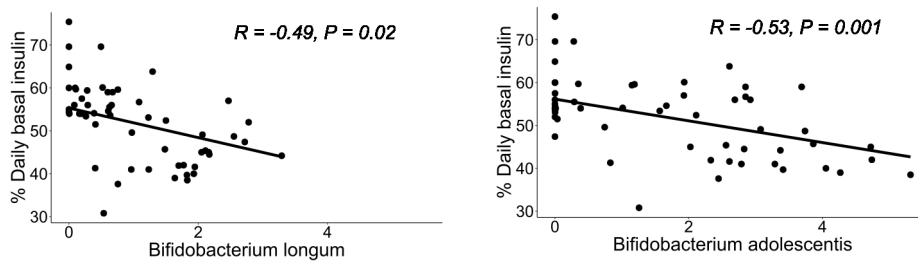

**D**

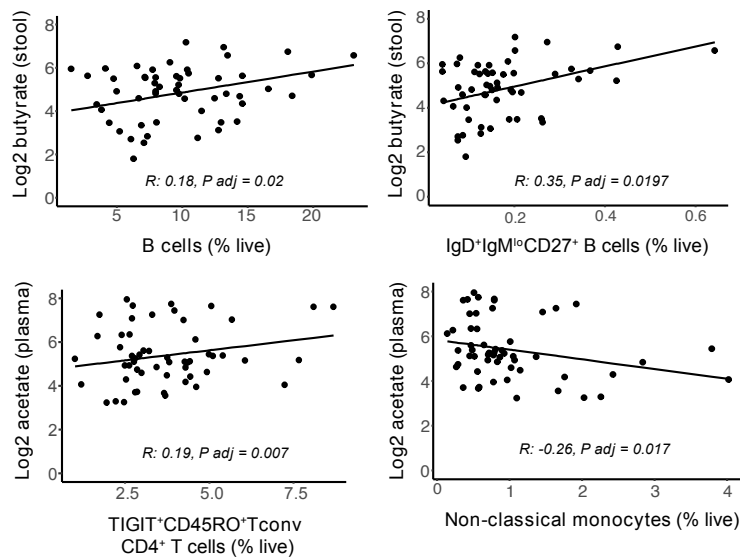

**Fig. S6. Correlations between concentration of SCFAs, clinical parameters, relative abundance of bacterial communities and significant changes in immune cell subsets.**

(A) Pearson r values at each timepoint between plasma butyrate and stool acetate and butyrate with daily basal insulin.

(B) Pearson r values at each timepoint between plasma butyrate and stool acetate and butyrate with time below target continual glucose monitoring range (70 – 180 mg/dL). Grey shading represents 95% confidence intervals.

(C) GEE generalized linear modelling regressions accounting for repeated measures between Log<sub>2</sub> relative abundances of *Bifidobacterium longum* and *adolescentis* and daily basal insulin. (D) Regression modelling between frequency of total live immune cells with Log<sub>2</sub> relative abundances of butyrate and acetate in plasma and stools using GEE generalised linearised modelling again adjusting for multiple correction using the Benjamini-Hochberg approach. Adjusted *P* values between the groups are shown on the graphs .



**A. Gastrointestinal Symptoms and nutritional changes**

| Questionnaires                                                    | Visit 1<br>(baseline) | Phone call<br>(week 1)      | Visit 2<br>(week 3) | Visit 3<br>(week 6) | Visit 4<br>(week 12)        |
|-------------------------------------------------------------------|-----------------------|-----------------------------|---------------------|---------------------|-----------------------------|
| Gastrointestinal<br>Quality of Life Index<br>(GIQLI), (P = 0.002) | 54 ± 6<br>(n=20)      | 57 ± 4<br>(n=20), P = 0.003 | 55 ± 4<br>(n=20)    | 54 ± 7<br>(n=20)    | 57 ± 3<br>(n=19), P = 0.003 |
| Diabetes-Specific<br>Quality of Life                              | 27 ± 5<br>(n=20)      | 31 ± 3<br>(n=20)            | 29 ± 4<br>(n=20)    | 29 ± 5<br>(n=20)    | 28 ± 6<br>(n=19)            |

**B. Macronutrient intake did not differ between timepoints**

| Nutrition Intake                         | Visit 1<br>(baseline)                 | Visit 3<br>(week 6)                   |
|------------------------------------------|---------------------------------------|---------------------------------------|
| Energy<br>(kJ [kCal])                    | 8746 ± 2033<br>[2092 ± 486]<br>(n=20) | 8686 ± 2469<br>[2078 ± 591]<br>(n=18) |
| Carbohydrate (% total<br>energy intake)  | 37.3 ± 9.3<br>(n=20)                  | 37.0 ± 7.1<br>(n=18)                  |
| Protein (% total<br>energy intake)       | 15.9 ± 4.0<br>(n=20)                  | 16.7 ± 4.0<br>(n=18)                  |
| Total Fat (% total<br>energy intake)     | 41.0 ± 38.5<br>(n=20)                 | 38.5 ± 4.7<br>(n=18)                  |
| Saturated Fat (% total<br>energy intake) | 14.5 ± 2.4<br>(n=20)                  | 14.3 ± 3.4<br>(n=18)                  |
| Fibre* (g)                               | 24.4 ± 7.0<br>(n=20)                  | 26.4 ± 10.3<br>(n=18)                 |
| Glycemic Index (%)                       | 54.2 ± 5.1<br>(n=20)                  |                                       |
| Glycemic Load (g)                        | 108.6 ± 38.4<br>(n=20)                |                                       |

**Table S1. Nutritional and gastrointestinal changes across time.**

(A) Gastrointestinal and diabetes-specific quality of life assessments. Overall significance determined by GEE, adjusted  $P < 0.002$ .  $P < 0.003$  (visit week 1 and week 4 vs baseline).

(B) Macronutrient intake across the study. Not significant.

| Pathway                                                            | Superclasses                          | Global FDR | p-value (0 - 6) | p-value (0 - 12) | p-value (6 - 12) |
|--------------------------------------------------------------------|---------------------------------------|------------|-----------------|------------------|------------------|
| L.citrulline.biosynthesis                                          | Amino.acid.biosynthesis               | 0.0000     | ●               | ●                | ●                |
| Urea.cycle                                                         | Amino.acid.biosynthesis               | 0.0000     | ●               | ●                | ●                |
| Calvin.Benson.Bassham.cycle                                        | Carbohydrate.biosynthesis             | 0.0000     | ●               | ●                | ●                |
| Pentose.phosphate.pathway (non.oxidative.branch)                   | Pentose.phosphate.pathways            | 0.0000     | ●               | ●                | ●                |
| Glycolysis.II (fructose.6.phosphate)                               | Glycolysis                            | 0.0000     | ●               | ●                | ●                |
| Glycolysis.I (glucose.6.phosphate)                                 | Glycolysis                            | 0.0000     | ●               | ●                | ●                |
| Homolactic.fermentation                                            | Fermentation                          | 0.0000     | ●               | ●                | ●                |
| Gluconeogenesis.III                                                | Carbohydrate.biosynthesis             | 0.0000     | ●               | ●                | ●                |
| Glycogen.degradation.II (eukaryotic)                               | Carbohydrate.degradation              | 0.0001     | ●               | ●                | ●                |
| Glycolysis.IV (plant.cytosol)                                      | Glycolysis                            | 0.0039     | ●               | ●                | ●                |
| Acetyl.CoA.fermentation.to.butanoate.II                            | Fermentation                          | 0.0043     | ●               | ●                | ●                |
| Glycolysis.VI (metazoan)                                           | Glycolysis                            | 0.0094     | ●               | ●                | ●                |
| Superpathway.of.hexitol.degradation (bacteria)                     | Secondary.metabolite.degradation      | 0.0094     | ●               | ●                | ●                |
| Chorismate.biosynthesis.from.3.dehydroquinate                      | Aromatic.compound.biosynthesis        | 0.0118     | ●               | ●                | ●                |
| GDP.mannose.biosynthesis                                           | Carbohydrate.biosynthesis             | 0.0118     | ●               | ●                | ●                |
| Purine.nucleobases.degradation.I (anaerobic)                       | Nucleoside.Nucleotide.Degradation     | 0.0118     | ●               | ●                | ●                |
| Superpathway.of.pyrimidine.ribonucleosides.degradation             | Nucleoside.Nucleotide.Degradation     | 0.0118     | ●               | ●                | ●                |
| Tetrapyrrole.biosynthesis.I (from.glutamate)                       | Tetrapyrrole.biosynthesis             | 0.0118     | ●               | ●                | ●                |
| L.rhamnose.degradation.I                                           | Carbohydrate.degradation              | 0.0159     | ●               | ●                | ●                |
| D.galactose.degradation.V (Leloir.pathway)                         | Carbohydrate.degradation              | 0.0174     | ●               | ●                | ●                |
| Dalactose.degradation.I (Leloir.pathway)                           | Carbohydrate.degradation              | 0.0174     | ●               | ●                | ●                |
| Guanosine.nucleotides.degradation.II                               | Nucleoside.Nucleotide.Degradation     | 0.0246     | ●               | ●                | ●                |
| Chorismate.biosynthesis.I                                          | Aromatic.compound.biosynthesis        | 0.0303     | ●               | ●                | ●                |
| Creatinine.degradation.I                                           | Amine.polyamine.biosynthesis          | 0.0308     | ●               | ●                | ●                |
| L.methionine.biosynthesis.III                                      | Amino.acid.biosynthesis               | 0.0325     | ●               | ●                | ●                |
| Palmitoleate.biosynthesis.I (from..5Z..dodec.5.enoate)             | Fatty.acid.lipid.biosynthesis         | 0.0325     | ●               | ●                | ●                |
| Superpathway.of.glycolysis.and.Entner.Doudoroff                    | Glycolysis                            | 0.0325     | ●               | ●                | ●                |
| Superpathway.of.arginine.and.polyamine.biosynthesis                | Amine.polyamine.biosynthesis          | 0.0332     | ●               | ●                | ●                |
| Gluconeogenesis.I                                                  | Carbohydrate.biosynthesis             | 0.0337     | ●               | ●                | ●                |
| Superpathway.of..beta..D.glucuronide.and.D.glucuronate.degradation | Carboxylate.degradation               | 0.0345     | ●               | ●                | ●                |
| Guanosine.nucleotides.degradation.III                              | Nucleoside.Nucleotide.Degradation     | 0.0347     | ●               | ●                | ●                |
| Superpathway.of.L.serine.and.glycine.biosynthesis.I                | Amino.acid.biosynthesis               | 0.0357     | ●               | ●                | ●                |
| Superpathway.of.polyamine.biosynthesis.I                           | Amine.polyamine.biosynthesis          | 0.0380     | ●               | ●                | ●                |
| Superpathway.of.pyridoxal.5 (phosphate.biosynthesis.and.salvage)   | Cofactor.Carrier.Vitamin.biosynthesis | 0.0429     | ●               | ●                | ●                |
| Adenosine.nucleotides.degradation.II                               | Nucleoside.Nucleotide.Degradation     | 0.0440     | ●               | ●                | ●                |
| 4.amino.2.methyl.5.phosphomethylpyrimidine.biosynthesis (yeast)    | Cofactor.Carrier.Vitamin.biosynthesis | 0.0487     | ●               | ●                | ●                |
| 4.deoxy.L.threo.hex.4.enopyranuronate.degradation                  | Secondary.metabolite.degradation      | 0.0487     | ●               | ●                | ●                |
| 5.aminoimidazole.ribonucleotide.biosynthesis.I                     | Nucleoside.Nucleotide.biosynthesis    | 0.0487     | ●               | ●                | ●                |
| 5.aminoimidazole.ribonucleotide.biosynthesis.II                    | Nucleoside.Nucleotide.biosynthesis    | 0.0487     | ●               | ●                | ●                |
| Biotin.biosynthesis.II                                             | Cofactor.Carrier.Vitamin.biosynthesis | 0.0487     | ●               | ●                | ●                |
| Fatty.acid.elongation (saturated)                                  | Fatty.acid.lipid.biosynthesis         | 0.0487     | ●               | ●                | ●                |
| Flavin.biosynthesis.III                                            | Cofactor.Carrier.Vitamin.biosynthesis | 0.0487     | ●               | ●                | ●                |
| Folate.transformations.II                                          | Cofactor.Carrier.Vitamin.biosynthesis | 0.0487     | ●               | ●                | ●                |
| N10.formyl.tetrahydrofolate.biosynthesis                           | Cofactor.Carrier.Vitamin.biosynthesis | 0.0487     | ●               | ●                | ●                |
| Palmitate.biosynthesis.II (bacteria.and.plants)                    | Fatty.acid.lipid.biosynthesis         | 0.0487     | ●               | ●                | ●                |
| Purine.ribonucleosides.degradation                                 | Nucleoside.Nucleotide.Degradation     | 0.0487     | ●               | ●                | ●                |

**Table S2. Functional pathways encoded by the gut microbiota changed after taking dietary supplement.** Table of the 46 individual pathways that significantly differed across timepoints. The metaCyc superclasses assigned to each pathway are shown. Significance determined by GEE comparisons. Circles represent pairwise adjusted *P* values of either increases or decreases in abundance determined by estimated marginal means. Red indicates decrease, green indicates increase and black indicates no significant change. Small circle adjusted *P* value between 0.01 - 0.05, medium circle adjusted *P* value between 0.001 and 0.01, large circle adjusted *P* value is < 0.001.

Extended Data Table 3: Upregulated KEGG pathway gene sets identified using thecamera function of limma following 6-weeks of HAMSAB supplementation

|                                                                 | <b>NGenes</b> | <b>Direction</b> | <b>PValue</b> | <b>FDR</b>        |
|-----------------------------------------------------------------|---------------|------------------|---------------|-------------------|
| KEGG_PATHOGENIC_ESCHERICHIA_COLI_INFECTION                      | 46            | Up               | 1.03E-05      | <b>0.00032561</b> |
| KEGG_SPLICEOSOME                                                | 123           | Up               | 1.87E-05      | <b>0.00051181</b> |
| KEGG_ENDOCYTOSIS                                                | 153           | Up               | 2.09E-05      | <b>0.00054291</b> |
| KEGG_RIBOSOME                                                   | 85            | Up               | 4.76E-05      | <b>0.0009854</b>  |
| KEGG_PARKINSONS_DISEASE                                         | 112           | Up               | 0.00010368    | <b>0.0016533</b>  |
| KEGG_TOLL_LIKE_RECEPTOR_SIGNALING_PATHWAY                       | 74            | Up               | 0.00014285    | <b>0.0020007</b>  |
| KEGG_ALZHEIMERS_DISEASE                                         | 140           | Up               | 0.00019282    | <b>0.00243343</b> |
| <b>KEGG_OXIDATIVE_PHOSPHORYLATION</b>                           | 114           | Up               | 0.00022402    | <b>0.00268366</b> |
| KEGG_MELANOMA                                                   | 45            | Up               | 0.00027273    | <b>0.0030361</b>  |
| KEGG_LEISHMANIA_INFECTION                                       | 62            | Up               | 0.00029039    | <b>0.00317275</b> |
| KEGG_ANTIGEN_PROCESSING_AND_PRESENTATION                        | 59            | Up               | 0.00033346    | <b>0.00342159</b> |
| KEGG_EPITHELIAL_CELL_SIGNALING_IN_HELICOBACTER_PYLORI_INFECTION | 55            | Up               | 0.00070697    | <b>0.00570295</b> |
| KEGG_HUNTINGTONS_DISEASE                                        | 152           | Up               | 0.00076341    | <b>0.00602555</b> |
| KEGG_NOD_LIKE_RECEPTOR_SIGNALING_PATHWAY                        | 50            | Up               | 0.00093818    | <b>0.00686541</b> |
| KEGG_RENAL_CELL_CARCINOMA                                       | 60            | Up               | 0.0010362     | <b>0.00742162</b> |
| KEGG_PROTEASOME                                                 | 41            | Up               | 0.00109932    | <b>0.0076194</b>  |
| KEGG_BASAL_TRANSCRIPTION_FACTORS                                | 27            | Up               | 0.00126445    | <b>0.00845356</b> |
| KEGG_CHEMOKINE_SIGNALING_PATHWAY                                | 130           | Up               | 0.00129201    | <b>0.00858914</b> |
| KEGG_NEUROTROPHIN_SIGNALING_PATHWAY                             | 105           | Up               | 0.00144972    | <b>0.00932547</b> |
| KEGG_REGULATION_OF_ACTIN_CYTOSKELETON                           | 150           | Up               | 0.00193589    | <b>0.01149356</b> |
| KEGG_CELL_ADHESION_MOLECULES_CAMS                               | 90            | Up               | 0.00195375    | <b>0.01157105</b> |
| KEGG_FOCAL_ADHESION                                             | 140           | Up               | 0.00221472    | <b>0.01282635</b> |
| KEGG_CARDIAC_MUSCLE_CONTRACTION                                 | 48            | Up               | 0.00279329    | <b>0.01533061</b> |
| KEGG_NATURAL_KILLER_CELL_MEDIATED_CYTOTOXICITY                  | 94            | Up               | 0.00291243    | <b>0.01574646</b> |

|                                             |     |    |            |                   |
|---------------------------------------------|-----|----|------------|-------------------|
| <b>KEGG_FATTY_ACID_METABOLISM</b>           | 31  | Up | 0.0029675  | <b>0.01589851</b> |
| KEGG_BLADDER_CANCER                         | 35  | Up | 0.00302643 | <b>0.01615921</b> |
| KEGG_MAPK_SIGNALING_PATHWAY                 | 188 | Up | 0.00360128 | <b>0.01827748</b> |
| KEGG_GRAFT_VERSUS_HOST_DISEASE              | 29  | Up | 0.00372    | <b>0.01873001</b> |
| KEGG_APOPTOSIS                              | 78  | Up | 0.00388889 | <b>0.01930131</b> |
| KEGG_RIG_I_LIKE_RECEPTOR_SIGNALING_PATHWAY  | 50  | Up | 0.00419738 | <b>0.02048772</b> |
| KEGG_NUCLEOTIDE_EXCISION_REPAIR             | 43  | Up | 0.00450588 | <b>0.02152606</b> |
| KEGG_P53_SIGNALING_PATHWAY                  | 58  | Up | 0.00469188 | <b>0.02214565</b> |
| KEGG_TYPE_I_DIABETES_MELLITUS               | 31  | Up | 0.0049238  | <b>0.02287435</b> |
| KEGG_PANCREATIC_CANCER                      | 60  | Up | 0.00505389 | <b>0.02331806</b> |
| KEGG_GAP_JUNCTION                           | 62  | Up | 0.00526513 | <b>0.02405751</b> |
| KEGG_GLIOMA                                 | 52  | Up | 0.00576047 | <b>0.02548211</b> |
| KEGG_UBIQUITIN_MEDIATED_PROTEOLYSIS         | 128 | Up | 0.00673348 | <b>0.02852963</b> |
| KEGG_FC_GAMMA_R_MEDIATED_PHAGOCYTOSIS       | 82  | Up | 0.00742183 | <b>0.03043531</b> |
| KEGG_PROSTATE_CANCER                        | 78  | Up | 0.0075133  | <b>0.03075697</b> |
| KEGG_LYSOSOME                               | 114 | Up | 0.00767149 | <b>0.03116128</b> |
| KEGG_LEUKOCYTE_TRANSENDOTHELIAL_MIGRATION   | 77  | Up | 0.00785845 | <b>0.03158998</b> |
| KEGG_LONG_TERM_DEPRESSION                   | 45  | Up | 0.00832359 | <b>0.03282711</b> |
| KEGG_PATHWAYS_IN_CANCER                     | 232 | Up | 0.00923581 | <b>0.0354703</b>  |
| KEGG_AUTOIMMUNE_THYROID_DISEASE             | 29  | Up | 0.00938201 | <b>0.03582775</b> |
| KEGG_CYTOKINE_CYTOKINE_RECEPTOR_INTERACTION | 142 | Up | 0.00948482 | <b>0.03612752</b> |
| KEGG_O_GLYCAN_BIOSYNTHESIS                  | 19  | Up | 0.01145614 | <b>0.04146701</b> |
| KEGG_ALLOGRAFT_REJECTION                    | 28  | Up | 0.01161694 | <b>0.04174206</b> |
| KEGG_INSULIN_SIGNALING_PATHWAY              | 109 | Up | 0.01168677 | <b>0.04190557</b> |
| KEGG_SYSTEMIC_LUPUS_ERYTHEMATOSUS           | 72  | Up | 0.0122219  | <b>0.04305028</b> |
| KEGG_GLUTATHIONE_METABOLISM                 | 37  | Up | 0.01305531 | <b>0.04517673</b> |
| KEGG_ERBB_SIGNALING_PATHWAY                 | 68  | Up | 0.01450521 | <b>0.04835071</b> |
| KEGG_FC_EPSILON_RI_SIGNALING_PATHWAY        | 60  | Up | 0.01461368 | <b>0.04854072</b> |

|                                                           |    |    |            |            |
|-----------------------------------------------------------|----|----|------------|------------|
| KEGG_PEROXISOME                                           | 68 | Up | 0.01608822 | 0.05211834 |
| KEGG_HYPERTROPHIC_CARDIOMYOPATHY_HCM                      | 52 | Up | 0.01769088 | 0.05596578 |
| KEGG_PRION_DISEASES                                       | 22 | Up | 0.01869297 | 0.05823816 |
| KEGG_HISTIDINE_METABOLISM                                 | 17 | Up | 0.01985517 | 0.0607365  |
| KEGG_ASTHMA                                               | 19 | Up | 0.02068978 | 0.06258573 |
| KEGG_PANTOTHENATE_AND_COA_BIOSYNTHESIS                    | 14 | Up | 0.02075427 | 0.06267445 |
| KEGG_AMYOTROPHIC_LATERAL_SCLEROSIS_ALS                    | 39 | Up | 0.03240687 | 0.08521562 |
| KEGG_VIRAL_MYOCARDITIS                                    | 51 | Up | 0.03325894 | 0.08671254 |
| KEGG_ADIPOCYTOKINE_SIGNALING_PATHWAY                      | 52 | Up | 0.03549931 | 0.09071832 |
| KEGG_CHRONIC_MYELOID_LEUKEMIA                             | 65 | Up | 0.03662639 | 0.09294439 |
| KEGG_ARRHYTHMOGENIC_RIGHT_VENTRICULAR_CARDIOMYOPATHY_ARVC | 50 | Up | 0.03999511 | 0.09857803 |

**Extended Table 4: Results of differential gene expression testing with EdgeR and RUVseq comparing baseline and week 6.**

|                 | Symbol        | Kegg        | Entrez | Ensid           | Biotype                    | logFC      | logCPM     | LR         | PValue     | FDR               |
|-----------------|---------------|-------------|--------|-----------------|----------------------------|------------|------------|------------|------------|-------------------|
| ENSG00000163293 | NIPAL1        | K02927;K156 | 152519 | ENSG00000163293 | protein_coding             | 0.89120734 | -0.2292553 | 21.431591  | 3.67E-06   | <b>0.02950508</b> |
| ENSG00000265830 | AL592188.7    | -           | NA     | NA              | NA                         | -1.6461481 | 3.87234772 | 20.9804721 | 4.64E-06   | <b>0.02950508</b> |
| ENSG00000151789 | ZNF385D       | -           | 79750  | ENSG00000151789 | protein_coding             | 0.97465004 | -0.1851283 | 20.7996992 | 5.10E-06   | <b>0.02950508</b> |
| ENSG00000256682 | TAS2R12       | -           | NA     | ENSG00000256682 | transcribed_processed_pseu | -0.8103476 | 0.13631038 | 20.1731733 | 7.07E-06   | <b>0.03069855</b> |
| ENSG00000244620 | AL122127.25   | -           | NA     | ENSG00000244620 | lncRNA                     | -0.8226105 | -0.2533075 | 17.9550127 | 2.26E-05   | 0.07852794        |
| ENSG00000234737 | KRT18P15      | K07604      | NA     | ENSG00000234737 | processed_pseudogene       | -0.7636077 | -0.0768158 | 16.3552774 | 5.25E-05   | 0.15191943        |
| ENSG00000200176 | RNU1-19P      | -           | NA     | ENSG00000200176 | snRNA                      | -1.7081984 | -0.4483694 | 14.6018882 | 0.00013278 | 0.31017727        |
| ENSG00000262372 | RP11-669E14.6 | -           | NA     | ENSG00000262372 | lncRNA                     | -0.8576565 | 0.9211556  | 14.462905  | 0.00014295 | 0.31017727        |
| ENSG00000242330 | RN7SL683P     | -           | NA     | ENSG00000242330 | misc_RNA                   | -0.8904398 | 0.58026012 | 13.7810519 | 0.0002054  | 0.32443031        |
| ENSG00000229531 | RP1-102G20.5  | -           | NA     | ENSG00000229531 | lncRNA                     | -0.9716506 | -0.6471222 | 13.6808892 | 0.00021665 | 0.32443031        |
| ENSG00000243151 | AL592188.1    | -           | NA     | NA              | NA                         | -1.4369439 | 0.8413489  | 13.6594133 | 0.00021914 | 0.32443031        |
| ENSG00000213872 | AC092798.2    | K02912      | NA     | ENSG00000213872 | processed_pseudogene       | -0.5941114 | 1.27409491 | 13.2254338 | 0.00027618 | 0.32443031        |
| ENSG00000232150 | ST13P4        | K09560      | NA     | ENSG00000232150 | processed_pseudogene       | 0.79132674 | -0.0039007 | 13.2098057 | 0.00027849 | 0.32443031        |
| ENSG00000228939 | AKT3-IT1      | -           | NA     | ENSG00000228939 | lncRNA                     | -1.0941103 | 0.49959936 | 13.0622369 | 0.00030131 | 0.32443031        |
| ENSG00000230022 | FNTAP2        | K05955      | NA     | ENSG00000230022 | processed_pseudogene       | -0.6981356 | 0.2673223  | 12.9907356 | 0.00031304 | 0.32443031        |
| ENSG00000179639 | FCER1A        | K08089      | 2205   | ENSG00000179639 | protein_coding             | 0.69640723 | 5.57304406 | 12.9068765 | 0.00032738 | 0.32443031        |
| ENSG00000244926 | ALKBH3-AS1    | -           | NA     | ENSG00000244926 | lncRNA                     | -0.6325209 | 0.8576022  | 12.6807062 | 0.00036945 | 0.32443031        |
| ENSG00000227165 | WDR11-AS1     | -           | NA     | ENSG00000227165 | lncRNA                     | 0.64776202 | 1.82519829 | 12.6314678 | 0.00037931 | 0.32443031        |
| ENSG00000184261 | KCNK12        | K04921      | 56660  | ENSG00000184261 | protein_coding             | -0.7086483 | 0.60782211 | 12.4976605 | 0.00040746 | 0.32443031        |
| ENSG00000213934 | HBG1          | K13824      | 3047   | ENSG00000213934 | protein_coding             | 3.89714598 | 3.43276172 | 12.3404407 | 0.00044325 | 0.32443031        |
| ENSG00000259581 | TYRO3P        | K05116      | NA     | ENSG00000259581 | processed_pseudogene       | -0.9149902 | 0.74110044 | 12.3397649 | 0.00044341 | 0.32443031        |
| ENSG00000199090 | MIR326        | -           | NA     | ENSG00000199090 | miRNA                      | -1.2076769 | -0.4754362 | 12.2335269 | 0.00046938 | 0.32443031        |
| ENSG00000264827 | AL592188.4    | -           | NA     | NA              | NA                         | -1.2460294 | 0.0559869  | 12.1870994 | 0.00048121 | 0.32443031        |
| ENSG00000219712 | RP11-532F6.2  | -           | NA     | ENSG00000219712 | processed_pseudogene       | -0.8229917 | 0.60213829 | 12.1421356 | 0.00049295 | 0.32443031        |
| ENSG00000236564 | YWHAQP5       | K01368      | NA     | ENSG00000236564 | processed_pseudogene       | -0.9190066 | 1.52792651 | 12.1135394 | 0.00050057 | 0.32443031        |
| ENSG00000232545 | KB-318B8.7    | -           | NA     | ENSG00000232545 | lncRNA                     | -0.8938741 | 0.80369888 | 12.0670249 | 0.00051322 | 0.32443031        |
| ENSG00000246214 | RP11-260E18.1 | -           | NA     | ENSG00000246214 | lncRNA                     | -0.8462127 | -0.3832809 | 12.0199871 | 0.00052633 | 0.32443031        |
| ENSG00000243423 | RP5-837J1.1   | K02922      | NA     | ENSG00000243423 | processed_pseudogene       | -0.7767684 | -0.0455007 | 12.0045989 | 0.00053069 | 0.32443031        |
| ENSG00000273245 | RP11-434P11.2 | -           | NA     | ENSG00000273245 | lncRNA                     | -0.9898235 | 0.68240356 | 11.8614905 | 0.00057307 | 0.32443031        |
| ENSG00000196565 | HBG2          | K13824      | 3048   | ENSG00000196565 | protein_coding             | 2.18279037 | 3.63887166 | 11.8047345 | 0.0005908  | 0.32443031        |
| ENSG00000255139 | AP000442.1    | -           | NA     | ENSG00000255139 | lncRNA                     | -0.7669982 | -0.0717698 | 11.781517  | 0.00059822 | 0.32443031        |
| ENSG00000233668 | RP11-571F15.3 | K02995      | NA     | ENSG00000233668 | processed_pseudogene       | -0.7889548 | 0.26123087 | 11.7635972 | 0.000604   | 0.32443031        |
| ENSG00000231579 | RPL7P21       | -           | NA     | ENSG00000231579 | processed_pseudogene       | -0.7188238 | 0.68129816 | 11.7247235 | 0.00061675 | 0.32443031        |
| ENSG00000169313 | P2RY12        | K04298      | 64805  | ENSG00000169313 | protein_coding             | 0.66653542 | 3.47099239 | 11.5206187 | 0.00068828 | 0.35140987        |
| ENSG00000169224 | GCSAML        | -           | 148823 | ENSG00000169224 | protein_coding             | 0.7473603  | 1.90500889 | 11.2952994 | 0.00077704 | 0.37209139        |
| ENSG00000114698 | PLSCR4        | -           | 57088  | ENSG00000114698 | protein_coding             | 0.8124095  | 0.3216348  | 11.2544785 | 0.00079431 | 0.37209139        |
| ENSG00000122872 | ARL4P         | K07945      | NA     | ENSG00000122872 | processed_pseudogene       | -0.878271  | 0.01827066 | 11.2164842 | 0.00081074 | 0.37209139        |
| ENSG00000226394 | RP11-413E1.2  | K03948      | NA     | ENSG00000226394 | processed_pseudogene       | -0.7065362 | 1.06315787 | 11.188214  | 0.00082319 | 0.37209139        |
| ENSG00000226822 | RP11-356N1.2  | -           | NA     | ENSG00000226822 | lncRNA                     | -0.7504548 | 0.14859655 | 11.159626  | 0.00083597 | 0.37209139        |
| ENSG00000150681 | RGS18         | K16449      | 64407  | ENSG00000150681 | protein_coding             | 0.57056757 | 7.82878097 | 11.110042  | 0.00085862 | 0.37261766        |
| ENSG00000267243 | AC005307.3    | -           | NA     | ENSG00000267243 | lncRNA                     | 0.78132256 | -0.2084932 | 11.0241719 | 0.00089931 | 0.37650406        |
| ENSG00000122043 | LINC00544     | -           | NA     | ENSG00000122043 | lncRNA                     | -0.6086489 | 0.24314712 | 10.9820301 | 0.00092    | 0.37650406        |
| ENSG00000222078 | RN7SKP110     | -           | NA     | ENSG00000222078 | misc_RNA                   | -0.8642628 | 0.58909339 | 10.9567377 | 0.00093264 | 0.37650406        |

|                 |               |             |           |                 |                           |            |            |            |            |            |
|-----------------|---------------|-------------|-----------|-----------------|---------------------------|------------|------------|------------|------------|------------|
| ENSG00000262803 | RP11-160A9.3  | -           | NA        | ENSG00000262803 | processed_pseudogene      | -0.6035765 | 0.59618593 | 10.7980811 | 0.00101605 | 0.39222015 |
| ENSG00000269999 | CTD-3185P2.2  | -           | NA        | NA              | NA                        | -0.6058098 | 0.06204701 | 10.7967977 | 0.00101676 | 0.39222015 |
| ENSG00000242100 | RPL9P32       | K02940      | NA        | ENSG00000242100 | processed_pseudogene      | -1.1882256 | 0.3362082  | 10.6410903 | 0.00110602 | 0.39833901 |
| ENSG00000135525 | MAP7          | K10433      | 9053      | ENSG00000135525 | protein_coding            | 0.5855958  | 2.34012891 | 10.6205574 | 0.00111837 | 0.39833901 |
| ENSG00000249693 | THEGL         | -           | 100506564 | ENSG00000249693 | protein_coding            | 0.66788795 | -0.0567775 | 10.6137368 | 0.00112251 | 0.39833901 |
| ENSG00000270127 | RP11-526I2.5  | -           | NA        | ENSG00000270127 | lncRNA                    | -0.5692056 | 2.45076263 | 10.6106053 | 0.00112441 | 0.39833901 |
| ENSG00000140287 | HDC           | K01590      | 3067      | ENSG00000140287 | protein_coding            | 0.66616549 | 3.65920714 | 10.4632352 | 0.00121774 | 0.41460711 |
| ENSG00000236035 | RP11-90O23.1  | K14842      | NA        | ENSG00000236035 | processed_pseudogene      | -0.8446971 | 0.32008075 | 10.4626896 | 0.0012181  | 0.41460711 |
| ENSG00000168350 | DEGS2         | K04712      | 123099    | ENSG00000168350 | protein_coding            | -0.5900463 | -0.228832  | 10.362431  | 0.00128606 | 0.42152871 |
| ENSG00000267529 | RP11-53B2.1   | -           | NA        | ENSG00000267529 | lncRNA                    | -0.5802076 | 1.44944206 | 10.3462963 | 0.00129735 | 0.42152871 |
| ENSG00000149534 | MS4A2         | K08090      | 2206      | ENSG00000149534 | protein_coding            | 0.65017913 | 1.62677239 | 10.3265761 | 0.00131128 | 0.42152871 |
| ENSG00000090104 | RGS1          | K16449      | 5996      | ENSG00000090104 | protein_coding            | 0.6924649  | 0.92880024 | 10.2270516 | 0.00138396 | 0.43542912 |
| ENSG00000257802 | MRS2P2        | K16075      | NA        | ENSG00000257802 | processed_pseudogene      | -0.5811773 | 1.39896949 | 10.1950498 | 0.00140818 | 0.43542912 |
| ENSG00000250030 | RP11-584P21.4 | K12581      | NA        | ENSG00000250030 | processed_pseudogene      | -0.7250826 | -0.2792747 | 10.0720188 | 0.00150538 | 0.43542912 |
| ENSG00000178033 | FAM26E        | -           | 254228    | ENSG00000178033 | protein_coding            | 0.69042334 | 0.08536618 | 10.0586885 | 0.00151631 | 0.43542912 |
| ENSG00000235740 | RP11-436I24.1 | -           | NA        | ENSG00000235740 | lncRNA                    | -0.7618186 | 2.49456478 | 10.0552841 | 0.00151912 | 0.43542912 |
| ENSG00000180346 | TIGD2         | -           | 166815    | ENSG00000180346 | protein_coding            | 0.38947263 | 2.11125121 | 9.93964099 | 0.00161757 | 0.43542912 |
| ENSG00000121769 | FABP3         | K08752      | 2170      | ENSG00000121769 | protein_coding            | -0.6654635 | 0.64344034 | 9.80970354 | 0.00173593 | 0.43542912 |
| ENSG00000272412 | Metazoa_SRP   | -           | NA        | ENSG00000272412 | misc_RNA                  | -0.9478426 | -0.7710013 | 9.78658443 | 0.0017579  | 0.43542912 |
| ENSG00000133477 | FAM83F        | K12581;K029 | 113828    | ENSG00000133477 | protein_coding            | 0.74554827 | 0.32466309 | 9.78568989 | 0.00175875 | 0.43542912 |
| ENSG00000146122 | DAAM2         | K04512      | 23500     | ENSG00000146122 | protein_coding            | 0.75304352 | 1.1087293  | 9.75941283 | 0.00178407 | 0.43542912 |
| ENSG00000242609 | RP11-398A8.1  | -           | NA        | ENSG00000242609 | processed_pseudogene      | -0.943753  | -0.2999307 | 9.70985606 | 0.00183282 | 0.43542912 |
| ENSG00000244556 | ODCP          | K01581      | NA        | ENSG00000244556 | processed_pseudogene      | -0.6129997 | 1.39159499 | 9.67699441 | 0.0018659  | 0.43542912 |
| ENSG00000270772 | RP11-332H21.2 | K00161      | NA        | ENSG00000270772 | processed_pseudogene      | -0.7537208 | 0.75104364 | 9.66135551 | 0.00188185 | 0.43542912 |
| ENSG00000244071 | RPL9P33       | -           | NA        | ENSG00000244071 | processed_pseudogene      | -0.9680644 | 0.55139976 | 9.61127797 | 0.00193386 | 0.43542912 |
| ENSG00000148498 | PARD3         | K04237      | 56288     | ENSG00000148498 | protein_coding            | 0.62730521 | 2.39204056 | 9.58654404 | 0.00196009 | 0.43542912 |
| ENSG00000214283 | RP11-85F14.1  | -           | NA        | ENSG00000214283 | processed_pseudogene      | -0.7851905 | 0.50127068 | 9.55691682 | 0.00199197 | 0.43542912 |
| ENSG00000225213 | RP11-197M22.2 | -           | NA        | ENSG00000225213 | lncRNA                    | -0.9126482 | 0.00328871 | 9.50683701 | 0.00204708 | 0.43542912 |
| ENSG00000224072 | RP11-75A9.3   | -           | NA        | ENSG00000224072 | processed_pseudogene      | -0.5018623 | 1.21348529 | 9.47028445 | 0.00208827 | 0.43542912 |
| ENSG00000200156 | RNU5B-1       | -           | NA        | ENSG00000200156 | snRNA                     | -1.9344189 | 3.05544087 | 9.46234796 | 0.00209732 | 0.43542912 |
| ENSG00000160193 | WDR4          | K15443      | 10785     | ENSG00000160193 | protein_coding            | -0.6018569 | 2.55334198 | 9.44819244 | 0.00211357 | 0.43542912 |
| ENSG00000238961 | SNORA47       | -           | NA        | ENSG00000238961 | snoRNA                    | 0.54676923 | 1.63270152 | 9.41221088 | 0.00215545 | 0.43542912 |
| ENSG00000143429 | AC027612.6    | K14957      | NA        | ENSG00000143429 | transcribed_unprocessed_p | 0.63456364 | -0.0235772 | 9.40603674 | 0.00216272 | 0.43542912 |
| ENSG00000266222 | RP11-433M22.1 | -           | NA        | ENSG00000266222 | lncRNA                    | -1.3786895 | -0.5765254 | 9.39986868 | 0.00217001 | 0.43542912 |
| ENSG00000147650 | LRP12         | K12581;K092 | 29967     | ENSG00000147650 | protein_coding            | 0.46231259 | 2.05756168 | 9.39796876 | 0.00217226 | 0.43542912 |
| ENSG00000264878 | Z85986.1      | -           | NA        | NA              | NA                        | -0.8204803 | 0.64166997 | 9.39637173 | 0.00217415 | 0.43542912 |
| ENSG00000105971 | CAV2          | K12958      | 858       | ENSG00000105971 | protein_coding            | 0.89624386 | 0.56507987 | 9.39170381 | 0.0021797  | 0.43542912 |
| ENSG00000169902 | TPST1         | K01021      | 8460      | ENSG00000169902 | protein_coding            | 0.63024029 | 3.76623831 | 9.36097355 | 0.00221654 | 0.43542912 |
| ENSG00000259165 | DDX18P1       | K13179      | NA        | ENSG00000259165 | processed_pseudogene      | -0.4794796 | 2.10319687 | 9.26691834 | 0.0023333  | 0.43542912 |
| ENSG00000213216 | RP11-355O1.7  | K02975      | NA        | ENSG00000213216 | processed_pseudogene      | -0.5374137 | -0.3541348 | 9.23924616 | 0.00236882 | 0.43542912 |
| ENSG00000134317 | GRHL1         | K09275      | 29841     | ENSG00000134317 | protein_coding            | 0.7113523  | 1.50511366 | 9.22652942 | 0.00238533 | 0.43542912 |
| ENSG00000180822 | PSMG4         | K11878;K114 | 389362    | ENSG00000180822 | protein_coding            | -0.5626576 | 4.03413138 | 9.20162623 | 0.002418   | 0.43542912 |
| ENSG00000261096 | RP11-690I21.2 | -           | NA        | ENSG00000261096 | lncRNA                    | -0.9275259 | 0.29512228 | 9.19237684 | 0.00243025 | 0.43542912 |
| ENSG00000259781 | RP11-673C5.1  | K10802      | NA        | ENSG00000259781 | processed_pseudogene      | 0.55768482 | 2.01003051 | 9.1814456  | 0.00244481 | 0.43542912 |
| ENSG00000258839 | MC1R          | K04199      | 4157      | ENSG00000258839 | protein_coding            | -0.4984494 | 1.88646697 | 9.14375169 | 0.00249569 | 0.43542912 |
| ENSG00000241230 | RN7SL801P     | -           | NA        | ENSG00000241230 | misc_RNA                  | -0.9994051 | -0.8719354 | 9.13207818 | 0.00251166 | 0.43542912 |

|                 |               |        |    |                        |                            |            |            |            |            |            |
|-----------------|---------------|--------|----|------------------------|----------------------------|------------|------------|------------|------------|------------|
| ENSG00000225084 | AL450226.2    | -      | NA | ENSG00000225084        | lncRNA                     | -1.0944883 | -0.6367515 | 9.12872184 | 0.00251627 | 0.43542912 |
| ENSG00000233387 | RP11-342D11.3 | -      | NA | ENSG00000233387        | lncRNA                     | -0.5962417 | 1.01611416 | 9.11643451 | 0.00253323 | 0.43542912 |
| ENSG00000218313 | RP11-393I2.2  | K03004 | NA | ENSG00000218313        | processed_pseudogene       | -0.7196903 | 2.27709968 | 9.10218276 | 0.00255305 | 0.43542912 |
| ENSG00000206172 | HBA1          | K13822 |    | 3039 ENSG00000206172   | protein_coding             | 2.57425627 | 6.79071081 | 9.1016418  | 0.0025538  | 0.43542912 |
| ENSG00000252949 | AL136303.1    | -      | NA | NA                     | NA                         | -0.7734006 | -0.0439744 | 9.09317747 | 0.00256565 | 0.43542912 |
| ENSG00000186049 | KRT73         | K07605 |    | 319101 ENSG00000186049 | protein_coding             | -0.6310341 | 1.3030057  | 9.05516224 | 0.00261954 | 0.43542912 |
| ENSG00000137331 | IER3          | -      |    | 8870 ENSG00000137331   | protein_coding             | 0.57824846 | 2.48659946 | 9.03098965 | 0.00265441 | 0.43542912 |
| ENSG00000270711 | RP11-46A10.8  | -      | NA | ENSG00000270711        | processed_pseudogene       | -0.5642782 | -0.096552  | 9.02601523 | 0.00266164 | 0.43542912 |
| ENSG00000259073 | FOXN3-AS2     | -      | NA | ENSG00000259073        | lncRNA                     | -0.9905673 | 1.93736594 | 9.01068733 | 0.00268405 | 0.43542912 |
| ENSG00000198829 | SUCNR1        | K10042 |    | 56670 ENSG00000198829  | protein_coding             | 0.69733164 | 1.00221041 | 8.98718661 | 0.00271879 | 0.43542912 |
| ENSG00000233337 | UBE2FP3       | K10687 | NA | ENSG00000233337        | processed_pseudogene       | -0.555005  | 0.63784693 | 8.97256292 | 0.00274064 | 0.43542912 |
| ENSG00000175105 | ZNF654        | -      |    | 55279 ENSG00000175105  | protein_coding             | 0.41828049 | 5.20917483 | 8.96892697 | 0.0027461  | 0.43542912 |
| ENSG00000260536 | RP5-1085F17.4 | -      | NA | ENSG00000260536        | lncRNA                     | -0.6386072 | -0.0867436 | 8.95953932 | 0.00276024 | 0.43542912 |
| ENSG00000225338 | RP11-384C4.3  | K02893 | NA | ENSG00000225338        | processed_pseudogene       | -0.7379865 | 0.9478958  | 8.94833201 | 0.00277723 | 0.43542912 |
| ENSG00000225135 | RP11-361F15.2 | -      | NA | NA                     | NA                         | 0.57893038 | 3.79132538 | 8.92457141 | 0.00281359 | 0.43542912 |
| ENSG00000248477 | RP11-848G14.2 | K12807 | NA | ENSG00000248477        | transcribed_unprocessed_p  | -0.601899  | -0.0471494 | 8.9220552  | 0.00281747 | 0.43542912 |
| ENSG00000041353 | RAB27B        | K07886 |    | 5874 ENSG00000041353   | protein_coding             | 0.53812147 | 6.06263225 | 8.92148931 | 0.00281835 | 0.43542912 |
| ENSG00000251194 | RP1-68D18.2   | -      | NA | ENSG00000251194        | lncRNA                     | -0.4370391 | 2.39129262 | 8.91889817 | 0.00282235 | 0.43542912 |
| ENSG00000254556 | AF131215.4    | -      | NA | ENSG00000254556        | lncRNA                     | -0.9212989 | 1.6966818  | 8.91199385 | 0.00283304 | 0.43542912 |
| ENSG00000236086 | HMGN2P28      | K11300 | NA | ENSG00000236086        | processed_pseudogene       | -0.5542456 | -0.1943794 | 8.89532003 | 0.00285902 | 0.43542912 |
| ENSG00000116918 | TSNAX         | K17985 |    | 7257 ENSG00000116918   | protein_coding             | 0.39627946 | 5.54421015 | 8.89500285 | 0.00285952 | 0.43542912 |
| ENSG00000154188 | ANGPT1        | K05465 |    | 284 ENSG00000154188    | protein_coding             | 0.6714805  | 3.10272011 | 8.85886152 | 0.00291669 | 0.43542912 |
| ENSG00000259274 | CTD-2501E16.2 | -      | NA | ENSG00000259274        | lncRNA                     | -0.5521034 | 0.60660058 | 8.81787581 | 0.00298294 | 0.43542912 |
| ENSG00000151023 | ENKUR         | -      |    | 219670 ENSG00000151023 | protein_coding             | 0.59257685 | 2.70603105 | 8.80094614 | 0.00301074 | 0.43542912 |
| ENSG00000237672 | KRR1P1        | K06961 | NA | ENSG00000237672        | processed_pseudogene       | -0.571237  | 1.24881057 | 8.79756975 | 0.00301632 | 0.43542912 |
| ENSG00000268362 | CTD-2017D11.1 | -      | NA | ENSG00000268362        | lncRNA                     | -0.6276071 | 3.35680106 | 8.76225313 | 0.00307529 | 0.43542912 |
| ENSG00000272486 | RP11-532M24.1 | -      | NA | NA                     | NA                         | -0.5946875 | 0.33231092 | 8.75490148 | 0.00308771 | 0.43542912 |
| ENSG00000119862 | LGALS1        | -      |    | 29094 ENSG00000119862  | protein_coding             | 0.46801104 | 4.56850063 | 8.73132177 | 0.0031279  | 0.43542912 |
| ENSG00000181227 | RP4-682C21.2  | K00658 | NA | ENSG00000181227        | processed_pseudogene       | -0.9470581 | 0.49666119 | 8.72546921 | 0.00313795 | 0.43542912 |
| ENSG00000231697 | NANOGP5       | K10164 | NA | ENSG00000231697        | transcribed_processed_pseu | -0.6068257 | 0.17112729 | 8.71599316 | 0.00315431 | 0.43542912 |
| ENSG00000255320 | RP11-755F10.1 | -      | NA | ENSG00000255320        | lncRNA                     | -1.6680829 | -0.3842963 | 8.70020766 | 0.00318174 | 0.43542912 |
| ENSG00000234500 | GS1-124K5.10  | K03121 | NA | ENSG00000234500        | unprocessed_pseudogene     | -0.9128438 | -0.3655969 | 8.68528377 | 0.0032079  | 0.43542912 |
| ENSG00000270130 | RP11-214K3.23 | -      | NA | ENSG00000270130        | lncRNA                     | -0.5547594 | 0.79447858 | 8.65940702 | 0.00325377 | 0.43542912 |
| ENSG00000258485 | SRMP2         | K00797 | NA | ENSG00000258485        | processed_pseudogene       | -0.9512417 | -0.5645284 | 8.65477867 | 0.00326205 | 0.43542912 |
| ENSG00000261574 | RP1-168P16.2  | -      | NA | NA                     | NA                         | -1.1349624 | 1.4911027  | 8.63871187 | 0.00329094 | 0.43542912 |
| ENSG00000247473 | CARS-AS1      | -      | NA | ENSG00000247473        | lncRNA                     | -0.5126052 | 0.60729991 | 8.62761217 | 0.00331105 | 0.43542912 |
| ENSG00000230581 | RP11-390F4.8  | K05692 | NA | ENSG00000230581        | processed_pseudogene       | -0.6422787 | 0.31945708 | 8.62044233 | 0.00332411 | 0.43542912 |
| ENSG00000168497 | SDPR          | K19387 |    | 8436 ENSG00000168497   | protein_coding             | 0.49879442 | 7.23502216 | 8.61918539 | 0.00332641 | 0.43542912 |
| ENSG00000250159 | RP11-381K20.2 | -      | NA | ENSG00000250159        | lncRNA                     | -0.5343155 | 0.5247808  | 8.58220618 | 0.00339464 | 0.43542912 |
| ENSG00000229728 | RP11-314N13.3 | -      | NA | ENSG00000229728        | lncRNA                     | -0.5247487 | 0.8405925  | 8.57838776 | 0.00340176 | 0.43542912 |
| ENSG00000245534 | RP11-219B17.1 | -      | NA | ENSG00000245534        | lncRNA                     | -0.4744596 | 2.65463068 | 8.55909456 | 0.003438   | 0.43542912 |
| ENSG00000236576 | RP11-22B10.3  | -      | NA | ENSG00000236576        | processed_pseudogene       | -0.7223543 | 1.02486773 | 8.53033172 | 0.00349276 | 0.43542912 |
| ENSG00000244229 | RPL26P35      | K02898 | NA | ENSG00000244229        | processed_pseudogene       | -0.6495786 | -0.4590881 | 8.50185917 | 0.00354784 | 0.43542912 |
| ENSG00000119698 | PPP4R4        | K15426 |    | 57718 ENSG00000119698  | protein_coding             | 0.6224526  | 0.11776759 | 8.47790367 | 0.00359486 | 0.43542912 |
| ENSG00000225300 | RP11-439E19.1 | -      | NA | ENSG00000225300        | lncRNA                     | -0.7284191 | 1.2147235  | 8.4591367  | 0.00363214 | 0.43542912 |
| ENSG00000250903 | GMDS-AS1      | -      | NA | ENSG00000250903        | lncRNA                     | -0.3849423 | 4.2375539  | 8.44486094 | 0.00366076 | 0.43542912 |



|                 |               |             |    |        |                 |                            |            |            |            |            |            |
|-----------------|---------------|-------------|----|--------|-----------------|----------------------------|------------|------------|------------|------------|------------|
| ENSG00000178538 | CA8           | K01672      |    | 767    | ENSG00000178538 | protein_coding             | 0.58018021 | 1.72011573 | 8.44411366 | 0.00366227 | 0.43542912 |
| ENSG00000226705 | SDCBPP1       | K17254      | NA |        | ENSG00000226705 | processed_pseudogene       | -1.0848284 | -0.1764493 | 8.41923382 | 0.00371272 | 0.43542912 |
| ENSG00000243637 | AC019221.4    | -           | NA |        | NA              | NA                         | -0.706938  | -0.1086778 | 8.41839186 | 0.00371444 | 0.43542912 |
| ENSG00000272498 | RP11-415F23.3 | -           | NA |        | ENSG00000272498 | lncRNA                     | -0.5427869 | 2.80750313 | 8.40167931 | 0.00374875 | 0.43542912 |
| ENSG00000230124 | RP5-1180C10.2 | -           |    | 84320  | ENSG00000230124 | protein_coding             | -0.6910051 | 1.97814773 | 8.39954306 | 0.00375315 | 0.43542912 |
| ENSG00000122025 | FLT3          | K05092      |    | 2322   | ENSG00000122025 | protein_coding             | 0.59233982 | 3.12378094 | 8.37554554 | 0.00380303 | 0.43542912 |
| ENSG00000267694 | RP11-691H4.4  | -           | NA |        | ENSG00000267694 | lncRNA                     | -0.765662  | 0.72664129 | 8.37464987 | 0.00380491 | 0.43542912 |
| ENSG00000261451 | RP11-981G7.1  | -           | NA |        | ENSG00000261451 | lncRNA                     | -0.5503137 | 1.75711406 | 8.3722053  | 0.00381003 | 0.43542912 |
| ENSG00000260711 | RP11-747H7.3  | -           | NA |        | ENSG00000260711 | lncRNA                     | -0.6416419 | 3.2541186  | 8.35733955 | 0.00384133 | 0.43542912 |
| ENSG00000188536 | HBA2          | K13822      |    | 3040   | ENSG00000188536 | protein_coding             | 2.46026789 | 8.58469488 | 8.32661597 | 0.00390684 | 0.43542912 |
| ENSG00000264630 | RP11-4F22.2   | -           | NA |        | ENSG00000264630 | lncRNA                     | -1.164038  | 1.70746362 | 8.32258751 | 0.00391551 | 0.43542912 |
| ENSG00000185899 | TAS2R60       | K08474      |    | 338398 | ENSG00000185899 | protein_coding             | -0.9513838 | -0.3185196 | 8.2937732  | 0.00397812 | 0.43542912 |
| ENSG00000254254 | RP11-17A4.2   | -           | NA |        | ENSG00000254254 | lncRNA                     | -0.5536185 | -0.1655095 | 8.28134963 | 0.00400543 | 0.43542912 |
| ENSG00000264462 | MIR3648       | -           | NA |        | ENSG00000264462 | miRNA                      | -2.4334551 | 4.84918522 | 8.26822478 | 0.00403449 | 0.43542912 |
| ENSG00000227189 | AC092535.3    | -           | NA |        | ENSG00000227189 | lncRNA                     | -1.1436806 | -0.456219  | 8.26575249 | 0.00403999 | 0.43542912 |
| ENSG00000242716 | RNA5-8S5      | -           | NA |        | NA              | NA                         | -1.307075  | 1.89357817 | 8.22893622 | 0.00412277 | 0.43542912 |
| ENSG00000235398 | LINC00623     | -           | NA |        | NA              | NA                         | 0.48280967 | -0.0651094 | 8.22517215 | 0.00413133 | 0.43542912 |
| ENSG00000261308 | RP11-923I11.7 | -           |    | 401720 | ENSG00000261308 | protein_coding             | -0.4544419 | 0.92082726 | 8.21613505 | 0.00415195 | 0.43542912 |
| ENSG00000169439 | SDC2          | K16336      |    | 6383   | ENSG00000169439 | protein_coding             | 0.56513838 | 0.65496335 | 8.20103147 | 0.00418666 | 0.43542912 |
| ENSG00000240356 | RPL23AP7      | K02893      | NA |        | ENSG00000240356 | transcribed_processed_pseu | 0.53256584 | 2.75263848 | 8.18689088 | 0.00421942 | 0.43542912 |
| ENSG00000254879 | AC103828.1    | -           | NA |        | ENSG00000254879 | lncRNA                     | -0.8749204 | 1.26048295 | 8.1857995  | 0.00422196 | 0.43542912 |
| ENSG00000170011 | MYRIP         | -           |    | 25924  | ENSG00000170011 | protein_coding             | -0.5560325 | 1.66232411 | 8.18453199 | 0.00422491 | 0.43542912 |
| ENSG00000102554 | KLF5          | K09206      |    | 688    | ENSG00000102554 | protein_coding             | 0.49237617 | 1.96774472 | 8.17622084 | 0.00424431 | 0.43542912 |
| ENSG00000229052 | RP11-386I23.1 | K17985      | NA |        | ENSG00000229052 | transcribed_processed_pseu | -0.7306023 | 1.64187799 | 8.16790808 | 0.00426381 | 0.43542912 |
| ENSG00000207129 | RNA5SP187     | -           | NA |        | ENSG00000207129 | rRNA_pseudogene            | -0.4863946 | 0.63316606 | 8.16262206 | 0.00427625 | 0.43542912 |
| ENSG00000267702 | RP11-53B2.2   | -           | NA |        | ENSG00000267702 | lncRNA                     | -0.6823952 | 4.10014604 | 8.15986722 | 0.00428275 | 0.43542912 |
| ENSG00000184825 | HIST1H2AH     | K11251      | NA |        | NA              | NA                         | -0.5869907 | 2.80966761 | 8.15764436 | 0.004288   | 0.43542912 |
| ENSG00000240935 | PLGLA         | K01315      | NA |        | ENSG00000240935 | transcribed_unprocessed_p  | -0.8201849 | -0.5013883 | 8.1532354  | 0.00429844 | 0.43542912 |
| ENSG00000244180 | AL592188.2    | -           | NA |        | NA              | NA                         | -1.8235646 | 4.69288952 | 8.15232181 | 0.00430061 | 0.43542912 |
| ENSG00000100678 | SLC8A3        | K05849      |    | 6547   | ENSG00000100678 | protein_coding             | 0.64520648 | 0.25098556 | 8.14678766 | 0.00431375 | 0.43542912 |
| ENSG00000232564 | RP4-591N18.2  | -           | NA |        | ENSG00000232564 | lncRNA                     | -0.7202825 | 1.48679691 | 8.14370444 | 0.00432109 | 0.43542912 |
| ENSG00000128536 | CDHR3         | K16503;K114 |    | 222256 | ENSG00000128536 | protein_coding             | -0.5386647 | 2.39040826 | 8.141044   | 0.00432744 | 0.43542912 |
| ENSG00000196312 | HIATL2        | -           |    | 84278  | ENSG00000196312 | transcribed_unprocessed_p  | -0.3646159 | 2.9859268  | 8.13609868 | 0.00433925 | 0.43542912 |
| ENSG00000262074 | SNORD3B-2     | -           | NA |        | ENSG00000262074 | snoRNA                     | -1.1217256 | 0.40683584 | 8.12100494 | 0.00437553 | 0.43542912 |
| ENSG00000226803 | RP11-203B9.4  | -           | NA |        | ENSG00000226803 | lncRNA                     | -0.4090472 | 2.54123601 | 8.10966933 | 0.00440298 | 0.43542912 |
| ENSG00000244734 | HBB           | K13823      |    | 3043   | ENSG00000244734 | protein_coding             | 3.30244583 | 9.6144834  | 8.10308024 | 0.00441901 | 0.43542912 |
| ENSG00000105982 | RNF32         | -           |    | 140545 | ENSG00000105982 | protein_coding             | -0.4066835 | 1.76876839 | 8.09402861 | 0.00444113 | 0.43542912 |
| ENSG00000200397 | Y_RNA         | -           | NA |        | ENSG00000200397 | misc_RNA                   | -0.4431899 | 0.39675556 | 8.0743391  | 0.00448965 | 0.43542912 |
| ENSG00000254481 | PTP4A2P2      | K18041      | NA |        | ENSG00000254481 | processed_pseudogene       | 0.50255239 | 0.90021554 | 8.06518284 | 0.00451239 | 0.43542912 |
| ENSG00000268367 | AC126614.1    | K02927      | NA |        | NA              | NA                         | -0.9876112 | -0.5321461 | 8.06411322 | 0.00451506 | 0.43542912 |
| ENSG00000228492 | RAB11FIP1P1   | K12484      | NA |        | ENSG00000228492 | processed_pseudogene       | -0.5886651 | 2.45479362 | 8.05718896 | 0.00453234 | 0.43542912 |
| ENSG00000223899 | SEC13P1       | K14004      | NA |        | ENSG00000223899 | processed_pseudogene       | -0.7329607 | -0.3933527 | 8.05228604 | 0.00454463 | 0.43542912 |
| ENSG00000266378 | RP11-214O1.3  | -           | NA |        | ENSG00000266378 | lncRNA                     | -1.0299226 | 0.80746186 | 8.04219452 | 0.00457001 | 0.43542912 |

Mass cytometry panel used for immunophenotyping

| <b>Metal Isotope /Fluorochrome</b>                        | <b>Antigen</b>  | <b>Clone</b> | <b>Manufacturer</b> |
|-----------------------------------------------------------|-----------------|--------------|---------------------|
| Barcoding and fluorescent                                 |                 |              |                     |
| <sup>104</sup> Pd, <sup>106</sup> Pd or <sup>108</sup> Pd | CD45            | 30-F11       | BD/Biolegend        |
| Biotin                                                    | CD86            | IT2.2        | BD                  |
| AF647                                                     | CD160           | BY55         | BD                  |
| Remaining surface stain                                   |                 |              |                     |
| <sup>89</sup> Y                                           | CD11c           | Bu15         | Biolegend           |
| <sup>113</sup> In                                         | IgM             | G20127       | BD                  |
| <sup>115</sup> In                                         | Biotin          | 1D4-C5       | Biolegend           |
| <sup>139</sup> La                                         | CD56            | NCAM16.2     | BD                  |
| <sup>141</sup> Pr                                         | CD27            | M-T271       | BD                  |
| <sup>142</sup> Nd                                         | CD19            | HIB19        | Biolegend           |
| <sup>143</sup> Nd                                         | CD45RA          | HI100        | BD                  |
| <sup>144</sup> Nd                                         | TCRgd           | B1           | Biolegend           |
| <sup>145</sup> Nd                                         | CD4             | RPA-T4       | Biolegend           |
| <sup>146</sup> Nd                                         | IgD             | IA6-2        | BD                  |
| <sup>147</sup> Sm                                         | Cy5 (for AF647) | CY5-15       | Sigma               |
| <sup>149</sup> Sm                                         | CD366 (Tim3)    | 7D3          | BD                  |
| <sup>150</sup> Nd                                         | KLRG1           | SA231A       | Biolegend           |
| <sup>151</sup> Eu                                         | CD123           | 6H6          | Biolegend           |
| <sup>152</sup> Sm                                         | CD45RO          | UCHL1        | Biolegend           |
| <sup>153</sup> Eu                                         | CD62L           | DREG         | Biolegend           |
| <sup>154</sup> Gd                                         | CD3             | UCHT1        | BD                  |
| <sup>156</sup> Gd                                         | CD279 (PD-1)    | EH12 .2H7    | Biolegend           |
| <sup>158</sup> Gd                                         | CD87            | VIM5         | Biolegend           |
| <sup>159</sup> Tb                                         | CD223 (Lag3)    | 17B4         | Genetex             |
| <sup>161</sup> Dy                                         | CD274 (PD-L1)   | MIH1         | BD                  |
| <sup>165</sup> Ho                                         | CD16            | 3G8          | BD                  |
| <sup>166</sup> Er                                         | TIGIT           | MBSA43       | eBioscience         |
| <sup>167</sup> Er                                         | CD66a           | YTH71.3      | Abcam               |
| <sup>168</sup> Er                                         | CD8a            | RPA-T8       | BD                  |
| <sup>169</sup> Tm                                         | CD25            | M-A251       | Biolegend           |
| <sup>170</sup> Er                                         | CD152 (CTLA4)   | 14D3         | eBioscience         |
| <sup>172</sup> Yb                                         | CD197 (CCR7)    | G043H7       | Biolegend           |

| <b>Metal Isotope /Fluorochrome</b> | <b>Antigen</b>   | <b>Clone</b> | <b>Manufacturer</b> |
|------------------------------------|------------------|--------------|---------------------|
| Intracellular stain                |                  |              |                     |
| <sup>148</sup> Nd                  | Helios           | 22F6         | Nobus Bio           |
| <sup>155</sup> Gd                  | EOMES            | WD1928       | eBioscience         |
| <sup>162</sup> Er                  | FOXP3            | PCH101       | eBioscience         |
| <sup>163</sup> Dy                  | BLIMP            | 6D3          | BD                  |
| <sup>164</sup> Er                  | GATA3            | L50-823      | BD                  |
| <sup>171</sup> Yb                  | GranzymeB        | REA226       | Miltenyi            |
| <sup>175</sup> Lu                  | Perforin         | dG9          | Biolegend           |
| <sup>191/193</sup> Ir              | DNA Intercalator | -            | Fluidigm            |
| <sup>209</sup> Bi                  | T-bet            | 4B10         | BD                  |
